# Supplementary material for: Association Between Donor-Recipient Biological Relationship and Allograft Outcomes After Living Donor Kidney Transplant
Source: PubMed Central journal article supplement (PMC8044734; doi:10.1001/jamanetworkopen.2021.5718), 2021-04-13

## Supplementary Online Content

Husain SA, King KL, Sanichar N, Crew RJ, Schold JD, Mohan S. Association between donor-recipient biological relationship and allograft outcomes after living donor kidney transplant. *JAMA Netw Open*. 2021;4(4):e215718. doi:10.1001/jamanetworkopen.2021.5718

**eMethods.** Supplemental Methods

**eTable 1.** Proportion of Living Donor Kidney Transplants in the Primary Analysis Experiencing Allograft Rejection in the First Post-Transplant Year, by Donor Type

**eTable 2.** Association Between Donor-Recipient Biological Relationship and One-Year Allograft Rejection After Living Donor Kidney Transplant Among Recipients in the Primary Analysis Without Missing Data on Rejection (N=57,086)

**eTable 3.** Causes of Allograft Failure Among Living Donor Kidney Transplants in the Primary Analysis Experiencing Allograft Failure, by Donor Type

**eTable 4.** Baseline Characteristics of Living Donor Kidney Transplant Donors and Recipients Included in the Secondary Analysis (2000-2019)

**eTable 5.** Number of HLA Mismatches in Biologically Related Versus Unrelated Living Kidney Donor-Recipient Pairs in the Secondary Analysis (2000-2019)

**eTable 6.** Association Between Donor-Recipient Biological Relationship and Allograft Failure After Living Donor Kidney Transplant in the Secondary Analysis (2000-2019)

**eFigure 1.** Flow Diagram of Study Cohort for the Primary Analysis (2000-2014)

**eFigure 2.** United States Living Donor Kidney Transplants Included in the Primary and Secondary Analysis, 2000-2019, by Donor Type

**eFigure 3.** Unadjusted Kaplan-Meier Curves of Death-Censored Allograft Survival After Living Donor Kidney Transplant, 2000-2014, by the Total Number of Donor-Recipient HLA Mismatches (Log-Rank  $P < 0.001$  for Effect Across All Subgroups)

**eFigure 4.** Unadjusted Kaplan-Meier Curves of Death-Censored Allograft Survival After Living Donor Kidney Transplant, 2000-2014, by Donor-Recipient Biological Relationship

**eFigure 5.** Unadjusted Kaplan-Meier Curves of Death-Censored Allograft Survival After Living Donor Kidney Transplant, 2000-2014, by Donor-Recipient Biological Relationship, Stratified by the Total Number of Donor-Recipient HLA Mismatches

**eFigure 6.** Flow Diagram of Study Cohort for Secondary Analysis (2000-2019)

**This supplementary material has been provided by the authors to give readers additional information about their work.**

## eMethods. Supplemental Methods

This was a retrospective cohort study using the Organ Procurement and Transplantation Network Standard Transplant Analysis and Research file (2020Q1). Recipient characteristics, donor characteristics, and transplant characteristics included in the analysis were selected *a priori* based on clinical importance/relevance and availability in this retrospective database.

Donor-recipient pairs were classified as related if any biological relationship was reported. Relationships classified as biological included donor as a parent (7%), child (19%), sibling (27%), or “Biological blood related- Other” (7%). Relationships classified as non-biological included spouse/life partner (13%), “Nonbiological other unrelated directed donation” (21%), and nonbiological unrelated paired/domino/anonymous donation (6%).

Adults were defined by age  $\geq 18$  years. Donor and recipient race were assigned as recorded in the dataset. In adjusted models, donor race was treated as a categorical variable (White, Black/African American, Hispanic, or Other) with White race as the reference group. Given concordance between donor and recipient race ( $>90\%$  overall, including 95% concordance for Black/African American race and 92% concordance for White race) only donor race was included in adjusted models. Recipients were classified as having impaired functional status at transplant if functional status was recorded as requiring any assistance with activities of daily living, or if quantitated functional status was listed as having any greater than “minor” restrictions (i.e. if listed as having  $<90\%$  functional status). Recipients were considered to have received a preemptive transplant if they did not receive dialysis prior to transplant. Recipient dialysis time was calculated as the difference between the date of transplant and the date of dialysis initiation. However, 21,586 recipients explicitly listed as receiving dialysis before transplantation had dates of dialysis initiation that were not included; in these cases, dialysis time was categorized as “Not preemptive but time not known.” In adjusted models, dialysis time was treated as a categorical value, where pre-emptive transplantation ( $n=22,572$ ) was the reference, compared to dialysis time  $<1$  year ( $n=8,433$ ), dialysis time  $\geq 1$  year ( $20,389$ ), and unknown dialysis time ( $n=21,586$ ). Recipients were classified as having high PRA if any reported PRA value (initial, peak, or last) was  $\geq 80\%$ . In all other cases, including those with all PRA values  $<80\%$  and those with no PRA values recorded (25% overall, including 19% of recipients of unrelated transplants and 30% of recipients of related transplants), recipients were classified as not having high PRA. Recipient diabetes status was unknown or missing for 791 (0.8%) recipients; in these cases, the recipient was considered nondiabetic. Recipient employment status was classified as “employed” if the recipient was reported as working for income. Employment status was listed as unknown for 34% of recipients (28% of unrelated transplant recipients, 38% of related recipients). In multivariable analysis, employment status was treated as a categorical variable with 3 groups (employed, not employed, unknown) with “employed” as the reference group. Era was defined in 5-year increments (2000-2004, 2005-2009, or 2010-2014) and treated as a categorical variable, with 2000-2004 used as the reference group in multivariable analyses. A similar proportion of unrelated (3%) and related (4%) transplants were excluded due to missing data.

Recipients 1-year rejection status was classified as rejection, no rejection, or missing based on whether they were recorded as having rejection within the first year after transplant, regardless of the duration of follow up. Recorded causes of allograft failure were grouped into 6 categories: Acute or Chronic Rejection; Recurrent Disease; Surgical, Urologic, or Thrombosis; Infection (including polyomavirus); Primary Nonfunction; or Other. Cause of failure was only categorized as “Other” when it was recorded as “999- Other.”

Time of inception for the cohorts was at the time of transplant. Participants lost to follow up were censored at last follow up. Total analysis time for the primary analysis was 572,215 years, and median time to allograft failure, censoring, or end of follow up was 7.5 years for related transplants and 7.0 years for unrelated transplants. Visual inspection of  $-\ln[-\ln(\text{survival})]$  plots for donor-recipient biological relationship were used to confirm that Cox models satisfied the proportional hazards assumption.

**eTable 1.** Proportion of living donor kidney transplants in the primary analysis experiencing allograft rejection in the first post-transplant year, by donor type.

|                     | <b>Not Related</b>  | <b>Related</b>      |
|---------------------|---------------------|---------------------|
| <i>n (column %)</i> | <b>29,806 (41%)</b> | <b>43,174 (59%)</b> |
| No 1-year rejection | 20634 (69)          | 30360 (70)          |
| 1-year rejection    | 2925 (10)           | 3167 (7)            |
| Missing data        | 6247 (21)           | 9647 (22)           |

p<0.001 for table-wide comparison

**eTable 2.** Association between donor-recipient biological relationship and one-year allograft rejection after living donor kidney transplant among recipients in the primary analysis without missing data on rejection (n=57,086)

|                            | Unadjusted          |        | Model 1             |      | Model 2             |      | Model 3             |      |
|----------------------------|---------------------|--------|---------------------|------|---------------------|------|---------------------|------|
|                            | OR<br>(95% CI)      | p      | OR<br>(95% CI)      | p    | OR<br>(95% CI)      | p    | OR<br>(95% CI)      | p    |
| Donor related to recipient | 0.74<br>(0.70-0.78) | <0.001 | 1.04<br>(0.97-1.11) | 0.27 | 0.97<br>(0.90-1.04) | 0.34 | 0.94<br>(0.88-1.01) | 0.09 |

\*Odds ratios are is for biologically related donor-recipient pair (reference group = unrelated donor-recipient pair)

Model 1 variables: Donor-recipient relationship, number of HLA A mismatches, number of HLA B mismatches, number of HLA DR mismatches

Model 2: Model 1 + donor age, donor sex, donor race (categorical variable; reference: White; groups: Black/African American, Hispanic, Other; not included in models stratified by donor race), donor pre-donation creatinine (mg/dL), recipient age (years), recipient sex, recipient diabetes, recipient peripheral vascular disease, recipient functional status (impaired versus unimpaired), recipient dialysis time (categorical variable; reference: pre-emptive transplant; groups: <1 year, ≥1 year, unknown), recipient insurance type (categorical variable; reference: private insurance; groups: Medicare, Medicaid, Other), recipient employment status (reference: employed; categories: not employed, unknown employment status), recipient cause of kidney disease (cystic vs non-cystic; not included in models stratified by cystic disease), and ABO-incompatible transplant

Model 3: Model 2 + era (2000-2004, 2005-2009, 2010-2014, or 2015-2019, treated as a categorical variable)

**eTable 3.** Causes of allograft failure among living donor kidney transplants in the primary analysis experiencing allograft failure, by donor type.

|                                    | <b>Not Related</b> | <b>Related</b>     |
|------------------------------------|--------------------|--------------------|
| <i>n (column %)</i>                | <b>n=5214, 39%</b> | <b>n=8155, 61%</b> |
| Acute or Chronic Rejection         | 2647 (51)          | 4197 (51)          |
| Recurrent Disease                  | 409 (8)            | 791 (10)           |
| Surgical, Urologic, or Thrombosis  | 240 (5)            | 379 (5)            |
| Infection (including polyomavirus) | 287 (6)            | 297 (4)            |
| Primary Nonfunction                | 176 (3)            | 279 (3)            |
| Other                              | 1426 (27)          | 2176 (27)          |
| Missing                            | 29 (0.6)           | 36 (0.4)           |

p<0.001 for table-wide comparison

**eTable 4.** Baseline characteristics of living donor kidney transplant donors and recipients included in the secondary analysis (2000-2019).

| <i>n</i> (column %) or median (IQR)   | All<br><b>98,419 (100%)</b> | Not Related<br><b>44,553 (45%)</b> | Related<br><b>53,866 (55%)</b> | <b>p</b> |
|---------------------------------------|-----------------------------|------------------------------------|--------------------------------|----------|
| <b>Donor Characteristics</b>          |                             |                                    |                                |          |
| Age, years                            | 42 (33-51)                  | 45 (36-53)                         | 40 (31-49)                     | <0.001   |
| Female                                | 60,211 (61%)                | 28,901 (65%)                       | 31,310 (58%)                   | <0.001   |
| Race                                  |                             |                                    |                                | <0.001   |
| White                                 | 67,713 (69%)                | 34,417 (77%)                       | 33,296 (62%)                   |          |
| Black/African American                | 11,868 (12%)                | 3,531 (8%)                         | 8,337 (15%)                    |          |
| Hispanic/Latino                       | 13,604 (14%)                | 4,629 (10%)                        | 8,975 (17%)                    |          |
| Pre-donation serum creatinine (mg/dL) | 0.80 (0.70 - 1.00)          | 0.80 (0.70 - 0.96)                 | 0.83 (0.70 - 1.00)             | <0.001   |
| <b>Recipient Characteristics</b>      |                             |                                    |                                |          |
| Age, years                            | 49 (38-59)                  | 50 (41-59)                         | 48 (35-59)                     | <0.001   |
| Female                                | 37,878 (38%)                | 15,819 (36%)                       | 22,059 (41%)                   | <0.001   |
| Race                                  |                             |                                    |                                | <0.001   |
| White                                 | 64,258 (65%)                | 20,983 (70%)                       | 33,275 (62%)                   |          |
| Black/African American                | 14,044 (14%)                | 5,619 (13%)                        | 8,425 (16%)                    |          |
| Hispanic/Latino                       | 13,927 (14%)                | 5,051 (11%)                        | 8,876 (16%)                    |          |
| Cause of kidney disease               |                             |                                    |                                | <0.001   |
| Diabetes                              | 19,294 (20%)                | 9,335 (21%)                        | 9,959 (18%)                    |          |
| Hypertension                          | 14,288 (15%)                | 6,311 (14%)                        | 7,977 (15%)                    |          |
| Glomerular disease                    | 23,449 (24%)                | 10,488 (24%)                       | 12,961 (24%)                   |          |
| Cystic kidney disease                 | 10,767 (11%)                | 7,270 (16%)                        | 3,497 (6%)                     |          |
| Other/Unknown                         | 30,621 (31%)                | 11,149 (25%)                       | 19,472 (36%)                   |          |
| Panel reactive antibody ≥ 80%         | 2,234 (2%)                  | 1,078 (2%)                         | 1,156 (2%)                     | 0.004    |
| Diabetes                              | 28,365 (29%)                | 13,014 (29%)                       | 15,351 (29%)                   | 0.01     |
| Peripheral vascular disease           | 5,120 (5%)                  | 2,471 (6%)                         | 2,649 (5%)                     | <0.001   |
| Functional impairment                 | 57,928 (59%)                | 27,874 (63%)                       | 30,054 (56%)                   | <0.001   |
| Pre-transplant dialysis               |                             |                                    |                                |          |
| Pre-emptive (no dialysis)             | 31,625 (32%)                | 14,821 (33%)                       | 16,804 (31%)                   | <0.001   |
| <1 year                               | 12,358 (13%)                | 5,252 (12%)                        | 7,106 (13%)                    |          |
| 1 year or more                        | 29,810 (30%)                | 14,408 (32%)                       | 15,402 (29%)                   |          |
| Not preemptive but time not known     | 24,626 (25%)                | 10,072 (23%)                       | 14,554 (27%)                   |          |
| Employment status                     |                             |                                    |                                |          |
| Employed                              | 35,532 (36%)                | 18,688 (42%)                       | 16,844 (31%)                   | <0.001   |
| Not employed                          | 37,121 (38%)                | 16,955 (38%)                       | 20,166 (37%)                   |          |
| Unknown/missing                       | 25,766 (26%)                | 8,910 (20%)                        | 16,856 (31%)                   |          |
| Insurance                             |                             |                                    |                                |          |
| Private                               | 56,990 (58%)                | 26,951 (60%)                       | 30,039 (56%)                   | <0.001   |
| Medicare                              | 29,095 (30%)                | 13,595 (31%)                       | 15,500 (29%)                   |          |
| Medicaid                              | 3,939 (4%)                  | 1,320 (3%)                         | 2,619 (5%)                     |          |
| Other                                 | 8,395 (9%)                  | 2,687 (6%)                         | 5,708 (11%)                    |          |

| <b>Other Characteristics</b> |              |              |              |        |
|------------------------------|--------------|--------------|--------------|--------|
| ABO incompatible transplant  | 1,248 (1%)   | 700 (2%)     | 548 (1%)     | <0.001 |
| Transplant Era               |              |              |              |        |
| 2000-2004                    | 23,655 (24%) | 7,577 (17%)  | 16,078 (30%) | <0.001 |
| 2005-2009                    | 25,460 (26%) | 10,342 (23%) | 15,118 (28%) |        |
| 2010-2014                    | 23,865 (24%) | 11,887 (27%) | 11,978 (22%) |        |
| 2015-2019                    | 25,439 (26%) | 14,747 (33%) | 10,692 (20%) |        |

**eTable 5.** Number of HLA mismatches in biologically related versus unrelated living kidney donor-recipient pairs in the secondary analysis (2000-2019).

|                 | <b>All</b>           | <b>Not Related</b>  | <b>Related</b>      |          |
|-----------------|----------------------|---------------------|---------------------|----------|
| <i>column %</i> | <b>98,419 (100%)</b> | <b>44,553 (45%)</b> | <b>53,866 (55%)</b> | <b>p</b> |
| <i>Total</i>    |                      |                     |                     |          |
| 0               | 8%                   | 0.4%                | 14%                 | <0.001   |
| 1               | 5%                   | 0.9%                | 8%                  |          |
| 2               | 15%                  | 4%                  | 25%                 |          |
| 3               | 26%                  | 14%                 | 37%                 |          |
| 4               | 16%                  | 27%                 | 7%                  |          |
| 5               | 19%                  | 34%                 | 7%                  |          |
| 6               | 11%                  | 19%                 | 4%                  |          |
| <i>HLA A</i>    |                      |                     |                     |          |
| 0               | 21%                  | 9%                  | 32%                 | <0.001   |
| 1               | 52%                  | 44%                 | 59%                 |          |
| 2               | 27%                  | 47%                 | 10%                 |          |
| <i>HLA B</i>    |                      |                     |                     |          |
| 0               | 14%                  | 3%                  | 23%                 | <0.001   |
| 1               | 48%                  | 30%                 | 63%                 |          |
| 2               | 38%                  | 67%                 | 14%                 |          |
| <i>HLA DR</i>   |                      |                     |                     |          |
| 0               | 19%                  | 7%                  | 29%                 | <0.001   |
| 1               | 52%                  | 42%                 | 60%                 |          |
| 2               | 29%                  | 51%                 | 11%                 |          |



**eTable 6.** Association between donor-recipient biological relationship and allograft failure after living donor kidney transplant in the secondary analysis (2000-2019).

|                                                        | Unadjusted       |       | Model 1          |        | Model 2          |        | Model 3          |        |
|--------------------------------------------------------|------------------|-------|------------------|--------|------------------|--------|------------------|--------|
|                                                        | HR (95% CI)      | p     | HR (95% CI)      | p      | HR (95% CI)      | p      | HR (95% CI)      | p      |
| <b>Death-Censored Graft Failure</b>                    |                  |       |                  |        |                  |        |                  |        |
| Donor related to recipient- Full Cohort                | 1.02 (0.98-1.05) | 0.36  | 1.26 (1.21-1.32) | <0.001 | 1.07 (1.02-1.11) | 0.003  | 1.04 (1.00-1.09) | 0.05   |
| Donor related to recipient- Cystic Kidney Disease      | 0.91 (0.78-1.06) | 0.21  | 1.08 (0.91-1.29) | 0.37   | 1.04 (0.87-1.24) | 0.69   | 1.02 (0.85-1.22) | 0.84   |
| Donor related to recipient- Non-cystic Kidney Disease  | 0.96 (0.93-0.99) | 0.02  | 1.20 (1.15-1.25) | <0.001 | 1.07 (1.02-1.11) | 0.003  | 1.05 (1.00-1.09) | 0.04   |
| Donor related to recipient- Donor African American     | 1.03 (0.95-1.12) | 0.44  | 1.18 (1.07-1.30) | 0.001  | 1.12 (1.02-1.24) | 0.02   | 1.10 (1.00-1.21) | 0.05   |
| Donor related to recipient- Donor not African American | 0.94 (0.91-0.98) | 0.002 | 1.16 (1.11-1.21) | <0.001 | 1.05 (1.00-1.10) | 0.05   | 1.03 (0.98-1.07) | 0.27   |
| <b>Composite Graft Failure</b>                         |                  |       |                  |        |                  |        |                  |        |
| Donor related to recipient- Full Cohort                | 1.02 (1.00-1.05) | 0.11  | 1.16 (1.13-1.20) | <0.001 | 1.13 (1.09-1.17) | <0.001 | 1.11 (1.07-1.15) | <0.001 |
| Donor related to recipient- Cystic Kidney Disease      | 0.95 (0.85-1.06) | 0.34  | 1.05 (0.92-1.19) | 0.48   | 1.06 (0.93-1.20) | 0.41   | 1.04 (0.92-1.19) | 0.51   |
| Donor related to recipient- Non-cystic Kidney Disease  | 0.97 (0.94-0.99) | 0.01  | 1.11 (1.07-1.44) | <0.001 | 1.13 (1.10-1.17) | <0.001 | 1.11 (1.08-1.15) | <0.001 |
| Donor related to recipient- Donor African American     | 1.05 (0.98-1.13) | 0.17  | 1.16 (1.07-1.25) | <0.001 | 1.12 (1.03-1.21) | 0.01   | 1.09 (1.01-1.19) | 0.04   |
| Donor related to recipient- Donor not African American | 0.98 (0.96-1.01) | 0.19  | 1.11 (1.07-1.15) | <0.001 | 1.11 (1.08-1.15) | <0.001 | 1.09 (1.06-1.13) | <0.001 |
| <b>Recipient Death</b>                                 |                  |       |                  |        |                  |        |                  |        |
| Donor related to recipient- Full Cohort                | 1.00 (0.97-1.03) | 0.95  | 1.05 (1.00-1.09) | 0.03   | 1.07 (1.03-1.12) | 0.002  | 1.05 (1.01-1.10) | 0.02   |
| Donor related to recipient- Cystic Kidney Disease      | 0.94 (0.82-1.08) | 0.40  | 0.97 (0.82-1.15) | 0.74   | 0.94 (0.79-1.13) | 0.51   | 0.94 (0.78-1.12) | 0.48   |
| Donor related to recipient- Non-cystic Kidney Disease  | 0.95 (0.92-0.98) | 0.003 | 1.00 (0.96-1.04) | 0.95   | 1.08 (1.03-1.13) | 0.001  | 1.06 (1.01-1.11) | 0.01   |
| Donor related to recipient- Donor African American     | 1.10 (0.98-1.23) | 0.10  | 1.12 (0.98-1.27) | 0.10   | 0.98 (0.85-1.12) | 0.80   | 0.96 (0.83-1.10) | 0.54   |

|                                                        |                  |      |                  |      |                  |      |                  |      |
|--------------------------------------------------------|------------------|------|------------------|------|------------------|------|------------------|------|
| Donor related to recipient- Donor not African American | 0.99 (0.96-1.03) | 0.63 | 1.05 (1.00-1.09) | 0.05 | 1.05 (1.00-1.10) | 0.05 | 1.03 (0.98-1.08) | 0.21 |
|--------------------------------------------------------|------------------|------|------------------|------|------------------|------|------------------|------|

Hazard ratios are for biologically related donor-recipient pair (reference group = unrelated donor-recipient pair)

Model 1 variables: Donor-recipient relationship, number of HLA-A mismatches, number of HLA-B mismatches, number of HLA-DR mismatches

Model 2: Model 1 + donor age, donor sex, donor race (categorical variable; reference: White; groups: Black/African American, Hispanic, Other; not included in models stratified by donor race), donor pre-donation creatinine (mg/dL), recipient age (years), recipient sex, recipient diabetes, recipient peripheral vascular disease, recipient functional status (impaired versus unimpaired), recipient dialysis time (categorical variable; reference: pre-emptive transplant; groups: <1 year, ≥1 year, unknown), recipient insurance type (categorical variable; reference: private insurance; groups: Medicare, Medicaid, Other), recipient employment status (reference: employed; categories: not employed, unknown employment status), recipient cause of kidney disease (cystic vs non-cystic; not included in models stratified by cystic disease), and ABO-incompatible transplant

Model 3: Model 2 + era (2000-2004, 2005-2009, 2010-2014, or 2015-2019, treated as a categorical variable)

**eFigure 1.** Flow diagram of the study cohort for the primary analysis (2000-2014).

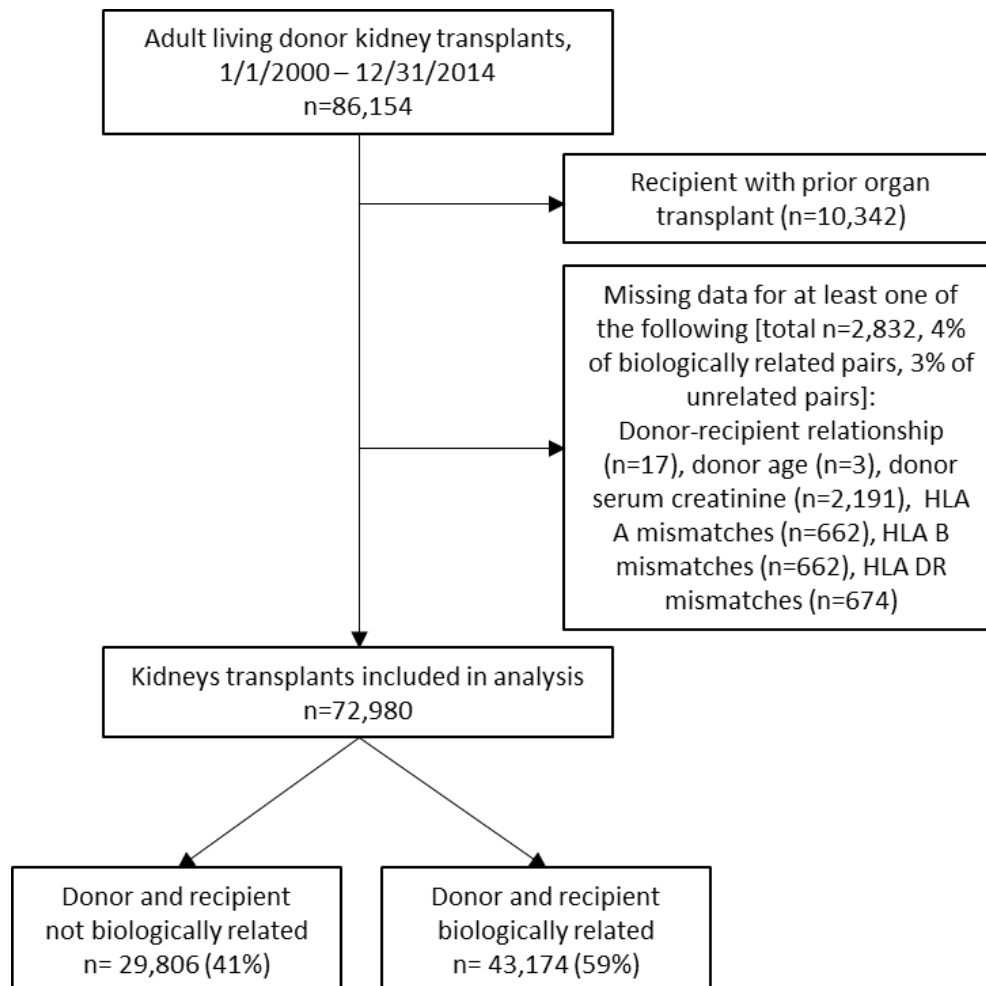

**eFigure 2.** United States living donor kidney transplants included in the primary and secondary analysis, 2000-2019, by donor type. Each bar represents the total number of living donor transplants during a given 5-year era, with blue sections showing the number of donor-recipient pairs without a biological relationship, and grey sections showing the number of biologically related donor-recipient pairs. Although the total number of transplants was similar in each era, the proportion of transplants from donors with no biological relationship to their recipient increased from 32% (2000-2004) to 58% (2015-2019) during the study period.

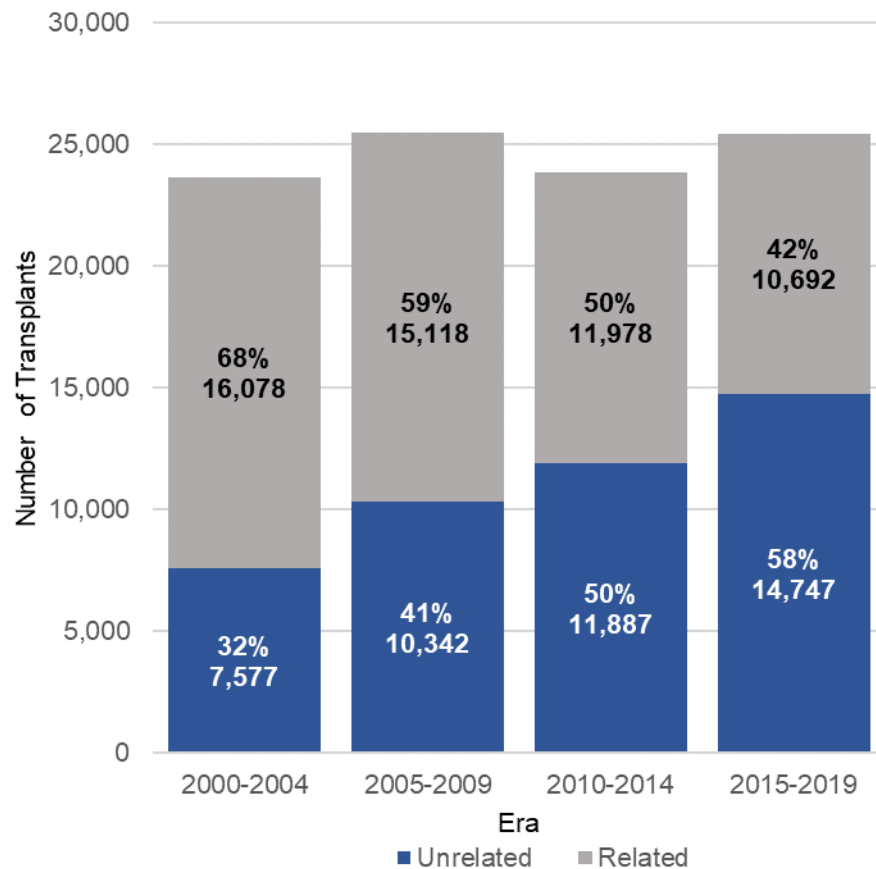

**eFigure 3.** Unadjusted Kaplan-Meier curves of death-censored allograft survival after living donor kidney transplant, 2000-2014 ,by the total number of donor-recipient HLA mismatches (log-rank  $p < 0.001$  for effect across all subgroups).

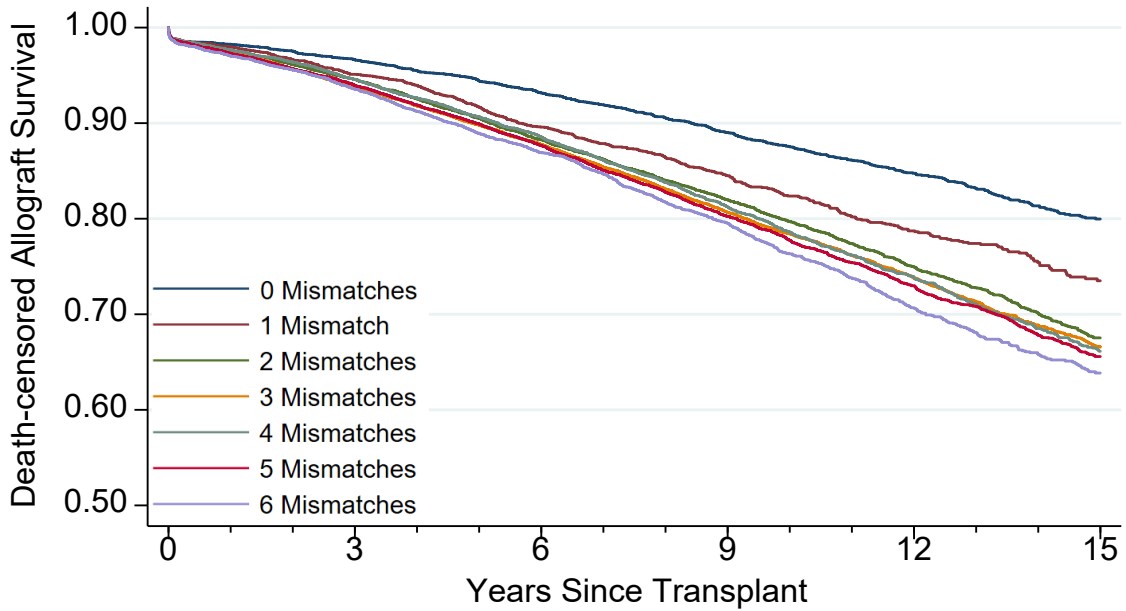

**Number at risk**

|              |       |       |       |      |      |      |
|--------------|-------|-------|-------|------|------|------|
| 0 Mismatches | 6064  | 5275  | 4033  | 2671 | 1566 | 717  |
| 1 Mismatch   | 3824  | 3259  | 2369  | 1479 | 826  | 331  |
| 2 Mismatches | 11821 | 10070 | 7329  | 4566 | 2402 | 976  |
| 3 Mismatches | 19928 | 16738 | 12111 | 7278 | 3809 | 1488 |
| 4 Mismatches | 11025 | 9442  | 6703  | 3891 | 1976 | 753  |
| 5 Mismatches | 13030 | 11074 | 7818  | 4389 | 2174 | 870  |
| 6 Mismatches | 7288  | 6181  | 4348  | 2439 | 1172 | 423  |

**eFigure 4.** Unadjusted Kaplan-Meier curves of death-censored allograft survival after living donor kidney transplant, 2000-2014, by donor-recipient biological relationship. There was no association between donor-recipient relationship and death-censored allograft failure (log-rank  $p=0.76$ ).

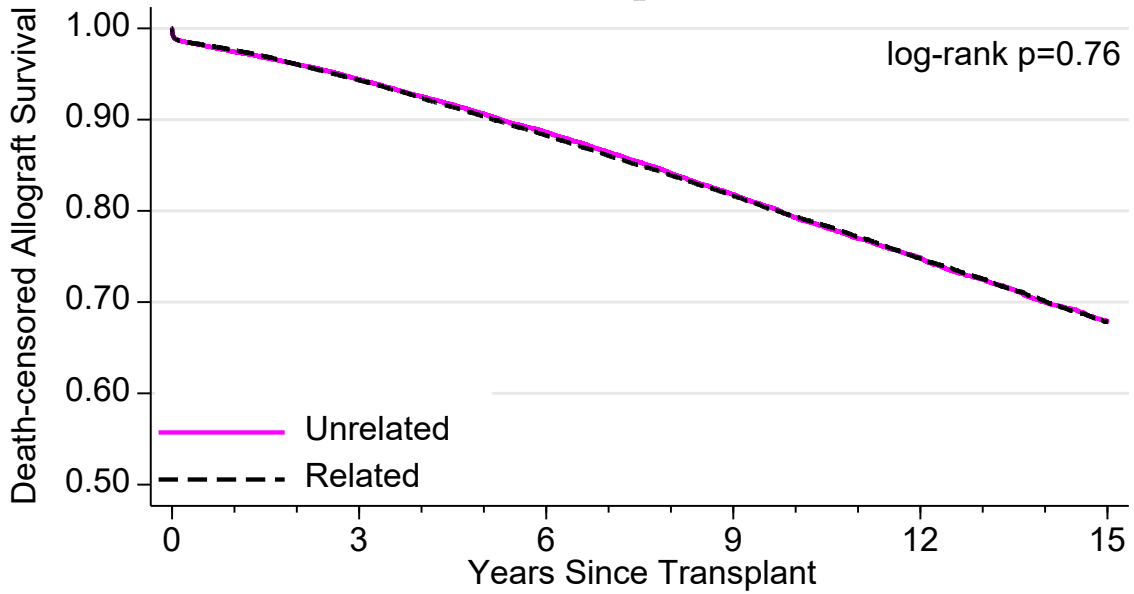

| Number at risk |       | 0     | 3     | 6     | 9    | 12   | 15 |
|----------------|-------|-------|-------|-------|------|------|----|
| Unrelated      | 29806 | 25505 | 17926 | 10021 | 4854 | 1784 |    |
| Related        | 43174 | 36534 | 26785 | 16692 | 9071 | 3774 |    |

**eFigure 5.** Unadjusted Kaplan-Meier curves of death-censored allograft survival after living donor kidney transplant, 2000-2014, by donor-recipient biological relationship, stratified by the total number of donor-recipient HLA mismatches.

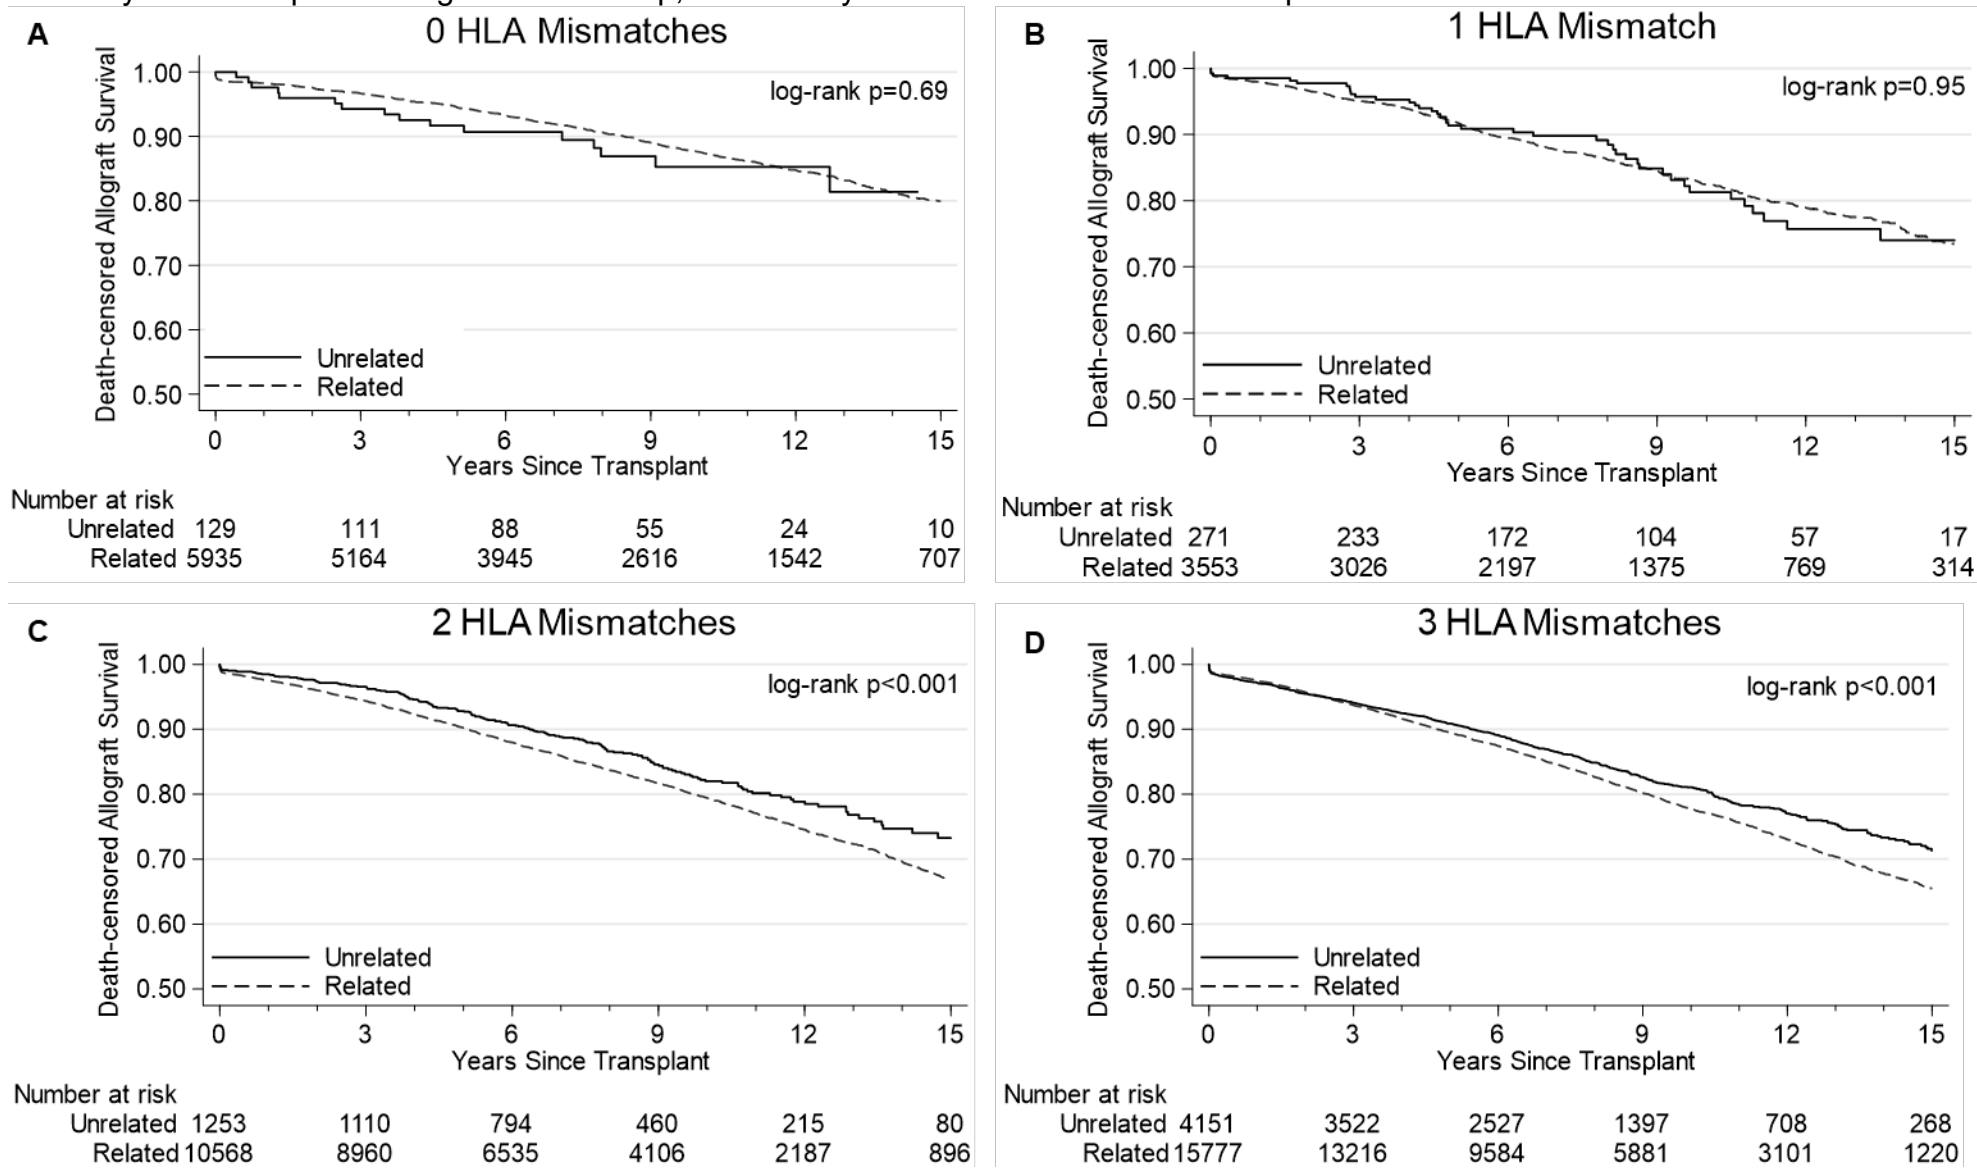

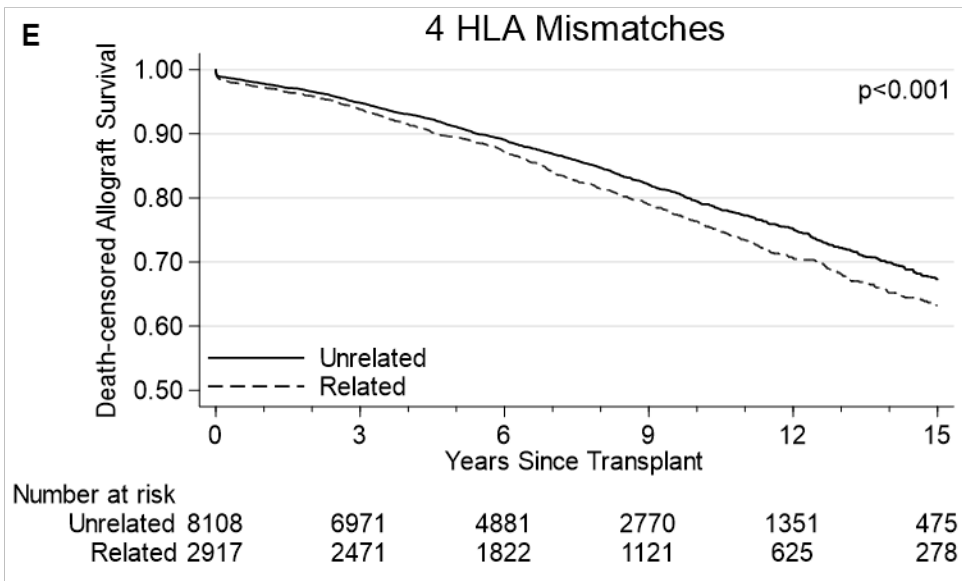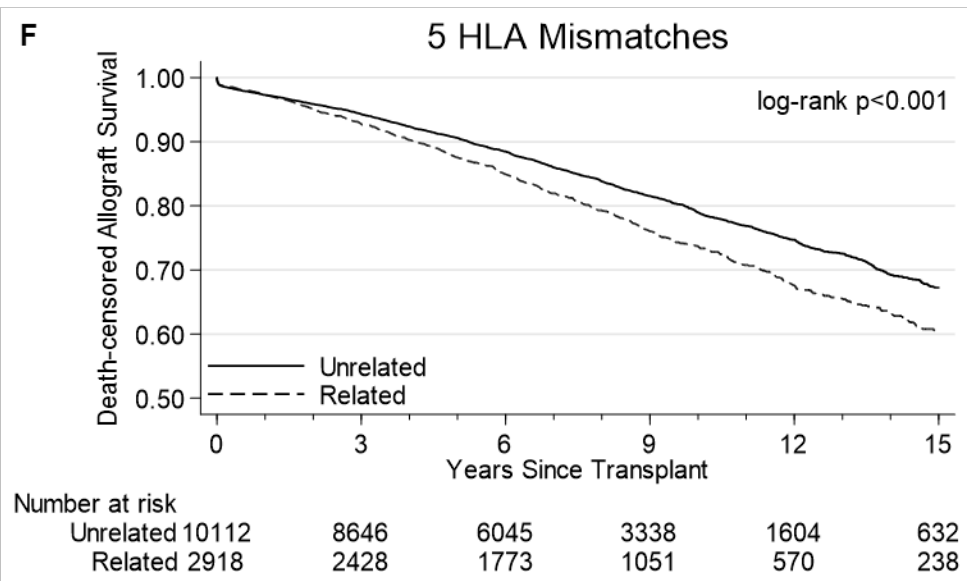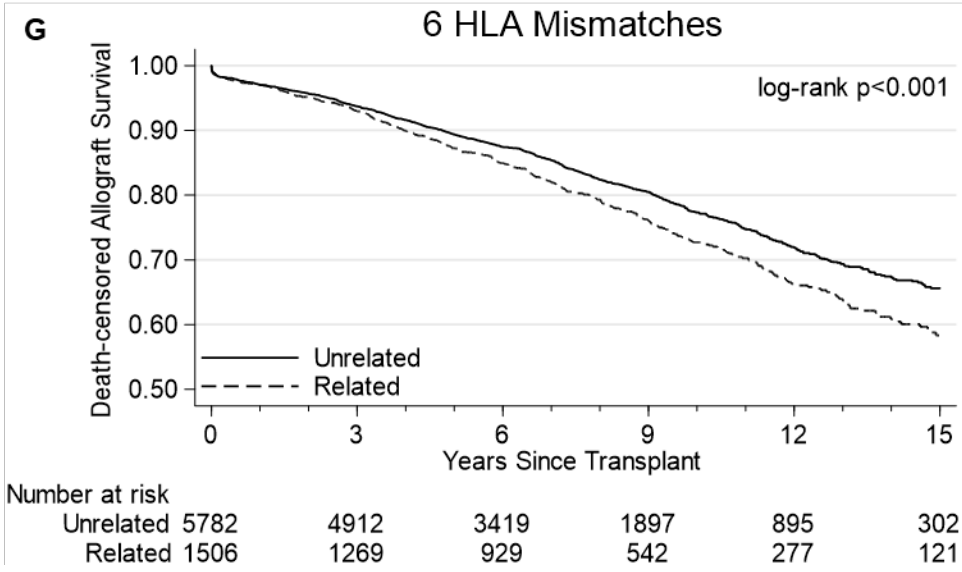



**eFigure 6.** Flow diagram of the study cohort for the secondary analysis (2000-2019).

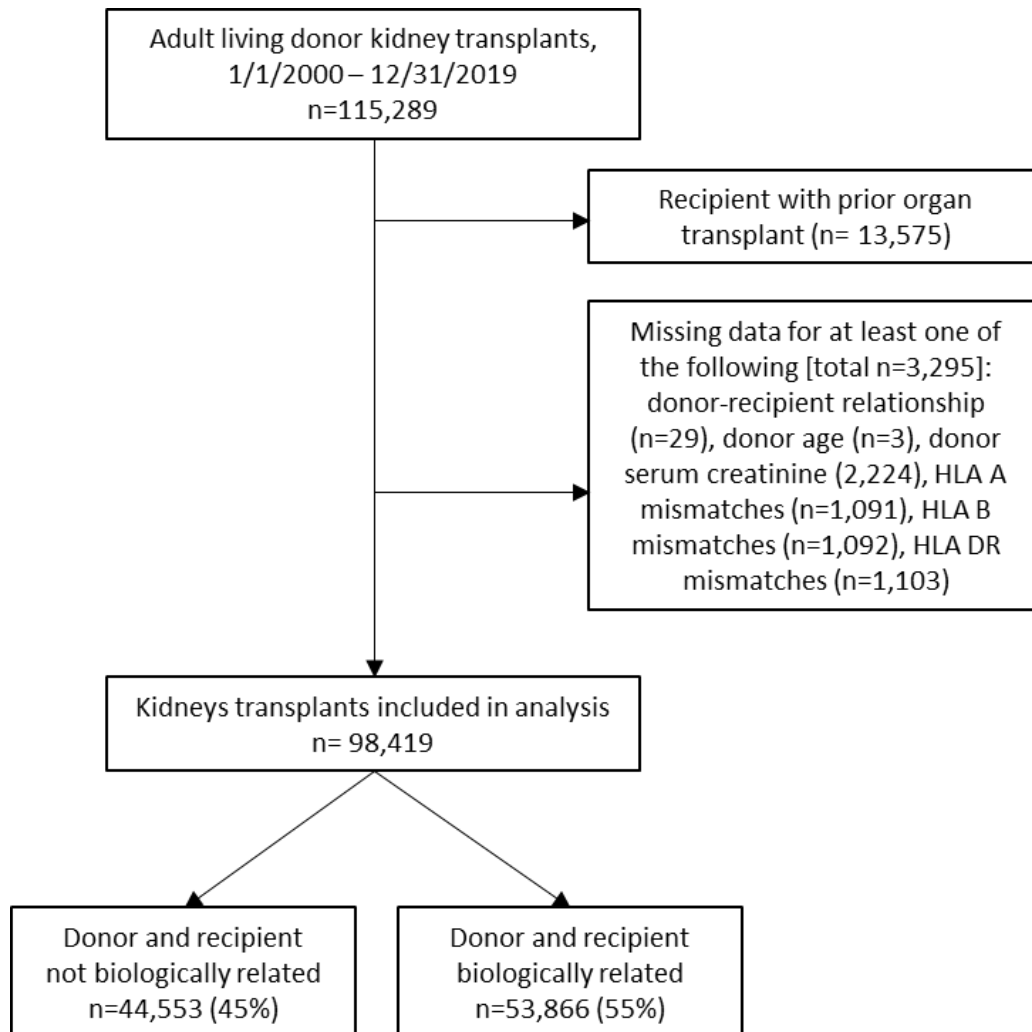

Supplement: jamanetwopen-e215718-s001.pdf [file jamanetwopen-e215718-s001.pdf]
